# Supplementary material for: The use of poly-cation oxides to lower the temperature of two-step thermochemical water splitting
Source: Royal Society of Chemistry journal article supplement (doi:10.1039/c8ee00050f), 2018-01-01
Supplement: c8ee00050f1.pdf [file c8ee00050f1.pdf]

## Use of poly-cation oxides to lower the temperature of two-step thermochemical water splitting

### Electronic Supplementary Information

Shang Zhai<sup>a</sup>, Jimmy Rojas<sup>a</sup>, Nadia Ahlborg<sup>b</sup>, Kipil Lim<sup>b,c</sup>,  
Michael F. Toney<sup>c</sup>, Hyungyu Jin<sup>a,f,\*</sup>, William C. Chueh<sup>b,d,e,\*</sup>, Arun Majumdar<sup>a,d,\*</sup>

<sup>a</sup> Department of Mechanical Engineering, Stanford University, Stanford, CA 94305, USA.

<sup>b</sup> Department of Materials Science and Engineering, Stanford University, Stanford, CA 94305, USA.

<sup>c</sup> Stanford Synchrotron Radiation Lightsource, SLAC National Accelerator Laboratory, Menlo Park, CA 94025, USA.

<sup>d</sup> Precourt Institute for Energy, Stanford University, Stanford, CA 94305, USA.

<sup>e</sup> Stanford Institute of Materials and Energy Sciences, SLAC National Accelerator Laboratory, Menlo Park, CA 94025, USA.

<sup>f</sup> Department of Mechanical Engineering, Pohang University of Science and Technology (POSTECH), Pohang 37673, South Korea.

\* Corresponding authors:

hgjin@postech.ac.kr; [wchueh@stanford.edu](mailto:wchueh@stanford.edu); [amajumdar@stanford.edu](mailto:amajumdar@stanford.edu)

## 1. Sample Synthesis

### *Solid-state synthesis*

All reagents used in these experiments were used without further purification treatment. For the solid-state (SS) synthesis, reagents in powder forms were mixed. To synthesize  $(\text{FeMgCoNi})\text{O}_x$ , for example, magnesium oxide (99.99%, Sigma-Aldrich), iron (II,III) oxide (99.997%, Alfa Aesar), cobalt (II,III) oxide (99.7%, Alfa Aesar) and nickel (II) oxide (99.99%, Sigma-Aldrich) with equimolar of cations were mixed for 1 min at 2000 rpm in a Vortex Mixer. The mixture was then transferred into an agate mortar and ground in acetone for 2 min. Calcinations were sequentially performed at 1000°C and 1350°C for 4 hours each (3°C/min between them), before a final cooling at 6°C/min to 500°C and a natural cooling thereafter. The sintered sample chunk was then broken and sieved (Fisherbrand stainless steel sieves) into 1.0~2.0 mm pieces for stagnation flow reactor. Powder sample was not used because fast gas flow in the reactor can blow away the powder from its holder. The remaining powder was used for quenching and X-ray characterizations, while the pieces were cycled in stagnation flow reactor explained below.

### *Sol-gel synthesis*

For  $(\text{FeMgCoNi})\text{O}_x$ , magnesium nitrate hexahydrate (99%, Sigma-Aldrich), iron(III) nitrate nonahydrate ( $\geq 98\%$ , Sigma-Aldrich), cobalt(II) nitrate hexahydrate ( $\geq 98\%$ , Sigma-Aldrich) and nickel(II) nitrate hexahydrate (crystalline, Sigma-Aldrich) with equimolar cations were dissolved in DI water with precursors:water = 1:4 in mass. EDTA (ethylenediamine tetraacetic acid, ACS, MP Biomedicals) and citric acid ( $\geq 99.5\%$ , Sigma-Aldrich) were added to the solution with 60% and 75% the total molar amount of metal ions, respectively. (For example, if there was 1 mole of each metal cation, 2.4 mol EDTA and 3 mol citric acid would be added.) With 300 rpm stirring, ammonium hydroxide solution (28% - 30%, Fisher Chemical) was added until pH = 11, and a dark solution formed.

The resulting solution was stirred and heated on a hot plate at 200°C for about 5 hrs (gelation). The spin bar was removed and the temperature was increased to 300°C to dry the gel overnight, during which foaming happened and gel became almost solid. The beaker was then moved to a box furnace and heated at 300°C for 1 hr. The sample was ground into powder, transferred to an

alumina boat and went through the following calcination in air: 10°C/min until 800°C and 5°C/min until 1000°C, held there for an hour, 5°C/min until 800°C and then natural cooling.

**Fig. S1** shows the sintering of the sol-gel (SG) samples when  $T_H$  exceeded the calcination temperature. Also compared is the morphology of the solid-state synthesized samples.

## 2. Reactors

### *TGA-GC*

The simultaneous thermal analyzer NETZSCH STA 449 F3 Jupiter was used for thermochemical water splitting measurement. The system schematic is shown in **Fig. S2**. Cellkraft Humidifier P-2 provided 0 ~ 15.0 vol% humidified Argon mixture to the system. All gas lines containing water vapor were heated to ~90°C to avoid condensation.

Gas Chromatograph (Thermo Scientific, Trace GC Ultra + Trace GC Valve Oven) with thermal conductivity detector (TCD) was used to quantify  $H_2$  in exhaust stream. Argon was used as carrier gas. Two columns are 25 m \* 0.530 mm TRX Q – BOND and 10 m \* 0.530 mm MS 5A PLOT 50  $\mu$ m). Each measurement cycle takes 3 min, and  $H_2$  production per gram of oxide is calculated by rectangular integration of the exhaust  $H_2$  concentration minus background  $H_2$  concentration (see **Table S1**). GC calibration gases are ultra-high purity (UHP) Ar, 54 ppm  $H_2$  balance Ar and 1012 ppm  $H_2$  balance Ar (Airgas). In this TGA-GC system, the uncertainty of GC quantification of  $H_2$  yield is  $\pm 0.1$  mL- $H_2$ /g/hour, considering  $\pm 1.5$  ppm uncertainty of GC quantification of  $H_2$  concentration.

A Zirox ZR5 oxygen sensor measured  $O_2$  partial pressure at the exhaust. The background  $pO_2$  was found to be around 10 ppm (5 to 15 ppm) when UHP Ar was purged and 2 vol% water balance Ar was purged. (ZR5 sensor cannot tolerate water vapor that may condense at room temperature.) This small leak is from the TGA and the humidifier.

Thermogravimetry (TG) time-history data can be used to quantify  $O_2$  evolutions. A “blank” experiment with no sample preceded each measurement, to identify the portion of mass change

associated with temperature and gas environment change; meanwhile the GC confirms background H<sub>2</sub> concentration. The sample mass increase during the water-splitting half-cycle could be theoretically assigned to incorporation of oxygen from steam into the sample and converted into H<sub>2</sub> yield (mL H<sub>2</sub> per gram of oxide). However, one should estimate the possible contribution to sample mass increase from accidental sample oxidation by background oxygen rather than steam. For example, during WS step, if 0.1 g of sample uptakes 10 ppm of O<sub>2</sub> in the background within total gas flow rate of 150 sccm, such contribution during 1 hour of WS will give an extra 0.13% TG increase beyond the sample mass change caused by water splitting. Even adding H<sub>2</sub> background may not easily remove such O<sub>2</sub> background; for example, at 600°C and 1 atm, combination reaction of 100 ppm H<sub>2</sub> and 20 ppm O<sub>2</sub> in Ar takes more than 10 seconds to reach equilibrium, based on a kinetics simulation<sup>1</sup>.

Under the condition above, if one purely relies on TG to quantify H<sub>2</sub> production, the amount would be overestimated by as much as 1.8 mL-H<sub>2</sub>/g. On the other, background O<sub>2</sub> is competing with steam to oxidize the sample, so the H<sub>2</sub> yield directly measured (with GC or else) under this condition would be smaller than an ideal case where no background O<sub>2</sub> is present.

Before each experiment, 150 sccm UHP Argon (Ar) was used to purge the system for about 1 hours (hr) until pO<sub>2</sub> stabilized. Then at about 160 sccm UHP Ar flow and 40°C/min ramp rate, the TGA furnace reached 1100°C; for T<sub>H</sub> = 1300°C, a 20°C/min ramp rate was used for further heating due to TGA equipment requirement. At T<sub>H</sub>, thermal reduction went on before it was cooled down at 50°C/min to T<sub>L</sub>. Then a humidifier was included to inject H<sub>2</sub>O into the purging Ar. In addition, background H<sub>2</sub> was injected to produce different ratios of H<sub>2</sub>:H<sub>2</sub>O partial pressures and water splitting reactions were studied. Gas composition details for different H<sub>2</sub>:H<sub>2</sub>O during water splitting are shown in **Table S1**. Subsequently, UHP Ar was used to purge for 5 min before the next cycle to drive away residual H<sub>2</sub> and H<sub>2</sub>O.

**Table S2** shows the comparison of TG derived H<sub>2</sub> production with direct GC quantification results. When background H<sub>2</sub> is high enough, the background O<sub>2</sub> effect mentioned above is negligible.

### *Stagnation flow reactor*

Kinetic experiments were performed using a custom-built stagnation flow reactor, shown schematically in **Fig. S4a**. Approximately 200 mg of solid-state synthesized sample was placed in a porous zirconia fiber cup, which rested at the bottom of a vertical, close-one-end, alumina process tube. As in the TGA, the samples were first rapidly heated to 1300°C (ramping to 1270°C at 200°C/min and to 1300°C at 20°C/min) using an infrared furnace (ULVAC-Riko, Tokyo, Japan) under 200 sccm of flowing argon (UHP), then rapidly cooled to 800°C (ramping to 830°C at 200°C/min and to 800°C at 20°C/min). A Nafion-membrane humidification system (Cellcraft, Stockholm, Sweden) was used to inject a mixture of 24.2% H<sub>2</sub>O and 0.0224% H<sub>2</sub> (balance gas argon) into the reactor with a total flow rate of 200 sccm. The reaction pressure is approximately 1 bar. A Prima BT Mass Spectrometer (Thermo Fisher Scientific, Waltham, MA) was used to quantify the concentrations of oxygen and hydrogen in the exhaust gas stream. The measured concentration, shown in **Fig. S4b**, is multiplied by the total gas flow rate (less the known flow rate of H<sub>2</sub> during the water-splitting step) gives the rate at which these gases were generated during each half-cycle. **Fig S5** shows the repeatability of the experiment over nine cycles.

For mass spectrometer, mass 32 (oxygen) and 2 (hydrogen) signals were calibrated by flowing known concentrations of each gas in argon and measuring the corresponding mass signals to form a calibration curve. Without a sample, it was observed during water-splitting conditions, both the mass 32 and mass 2 signals were higher than in pure argon; such signal elevations were attributed to water fragmentation. These backgrounds were subtracted from experimental data by averaging the measured values of several "blank" experiments, in which the reactor was bypassed and the process gases were flowed directly into the mass spectrometer. The error bars in O<sub>2</sub> and H<sub>2</sub> quantification represent the background drift from multiple "blank" runs multiplied by flow rate and time.

### **3. Quenching**

CTF 17/300 CARBOLITE tube furnace, along with CellKraft Humidifier P-10, were used as a reactor. Solid-state synthesized samples were ground with mortar and pestle into powder and went through thermal reduction and/or water splitting step(s) and finally quenched under Ar immediately. X-ray characterizations were done on such quenched samples. For a thermal

reduction quench, for instance, 100 sccm ultra-high purity Ar was purged into the tube furnace at 100°C until the pO<sub>2</sub> sensor showed ~10 ppm. The furnace was then ramped up to T<sub>H</sub> at 5°C/min, and after 30 min, the alumina boat containing the sample was pushed from the hot zone to the (actively) cooled upstream side of the furnace in 1 second. To achieve this, the Ar flow rate was increased to 600 mL/min to avoid back-flow from atmosphere, and then an alumina rod was inserted into the tube through a downstream Ultra Torr fitting previously plugged. Afterwards, it was plugged again. In a similar fashion, for a water splitting quenching test, the furnace would be cooled to T<sub>L</sub> after thermal reduction step and 10% humidified Ar (without H<sub>2</sub> background) would be purged for 1 hr. The same quenching process would take place afterwards.

#### 4. Characterizations

##### *X-ray diffraction*

Bruker D8 Advance X-ray diffractometer was used to collect powder diffraction patterns (XRD) using Cu K<sub>α</sub> radiation over a 2θ range of 20° to 90° (step size of 0.02° for 2θ, scan step of 94.5 sec, fixed divergence slit of 0.6°, and generator at 40 mA and 40 kV.) Phase identification and Rietveld simulation were conducted with HighScore Plus software and PDF-4 (Powder Diffraction File).

For Rietveld refinement (see **Fig. S6**), magnetite (Fe<sub>3</sub>O<sub>4</sub>) and Fe<sub>t</sub>O (t ≤ 1) were used to simulate spinel and rocksalt phases of quenched PCO, respectively. Fe, Co and Ni have very similar atomic scattering factors and, when mixed, they are difficult to distinguish on XRD<sup>2</sup>. The fact that t ≤ 1 is to account for two effects: 1) there is Mg on this site, 2) there are cation vacancies, similar as in nonstoichiometric FeO system, such as Fe<sub>0.9</sub>O. In Rietveld refinement, it's hard to accurately refine both parameters, namely, Mg occupancy and cation vacancy occupancy, so we assumed it to be just Fe deficient Fe<sub>t</sub>O. Thus the refined t value doesn't mean real stoichiometry of cation in the rocksalt phase, but rather the equivalent Fe occupancy leading to the same XRD pattern. So in the following approximate estimation of H<sub>2</sub> production, we use MO for rocksalt phase and M<sub>3</sub>O<sub>4</sub> for spinel, where metal M has average atomic weight of Fe, Mg, Co and Ni, which is 49.4 g/mol.

The two-phase models are set as the **Tables S3** and **S4** show. Three sets of solid-state synthesis,

quenching (at four conditions) and XRD were repeated for  $(\text{FeMgCoNi})\text{O}_x$  and the results are in **Table S5**. The trend of phase ratio change is consistent among all three sets, as plotted in **Figure 4b**.

We can roughly estimate  $\text{H}_2$  production of  $(\text{FeMgCoNi})\text{O}_x$  from the phase ratio swing refinement results. First we need to convert volumetric ratio to molar ratio. For rocksalt phase, the unit cell volume is about  $4.215^3 \text{ \AA}^3 = 74.89 \text{ \AA}^3$ ; there are 4 oxygen atoms in one unit cell; thus each oxygen corresponds to  $74.89/4 = 18.72 \text{ \AA}^3$  volume considering only anion sublattice. Similar calculation for spinel phase gives  $18.35 \text{ \AA}^3$ , which is close to the rocksalt phase. Thus we can assume that the volumetric ratio is the same as the oxygen molar ratio between these two phases.

Starting from  $(\text{FeMgCoNi})\text{O}_x$  containing 1 mol of oxygen atoms, which is water-oxidized at  $800^\circ\text{C}$ , there is 0.666 mol of MO unit and 0.334 mol of  $(1/4)\text{M}_3\text{O}_4$  unit according to **Table S5**. Suppose such oxide is thermally reduced to contain  $p$  mol of oxygen at  $1300^\circ\text{C}$  in Ar, and total amount of metal M which is  $p \cdot (0.697 + 0.303 \cdot 3/4)$  should equal to initial M amount which is  $0.666 + 0.334 \cdot 3/4 = 0.9165$  mol. Thus we get  $p = 0.992$  mol.

Such oxygen loss corresponds to  $(1-p)$  mol of  $\text{H}_2$  production.  $\text{H}_2$  production of  $(\text{FeMgCoNi})\text{O}_x$  is estimated to be 2.9 mL- $\text{H}_2$ /g from the phase ratio swing between  $T_H = 1300^\circ\text{C}$  and  $T_L = 800^\circ\text{C}$ .

Similar calculation between  $T_H = 1100^\circ\text{C}$  and  $T_L = 600^\circ\text{C}$  gives an estimation of  $\text{H}_2$  production of 1.8 mL- $\text{H}_2$ /g. The  $\text{H}_2$  yield estimation for  $1300\text{-}800^\circ\text{C}$  is similar to what **Figure 3a** presents, but the estimation for  $1100\text{-}600^\circ\text{C}$  is different from experimental results (we have not observed by GC any  $\text{H}_2$  production at  $1100\text{-}600^\circ\text{C}$  condition). The reasons can be: 1) quenching was done in a tube furnace, which is different from the TGA and stagnation flow reactor; 2) the estimation above is based on a Rietveld refinement where only Fe and cation vacancy were considered, so the resulting phase ratio was a rough estimate; 3) the water splitting reaction in the quenching experiment did not have  $\text{H}_2$  background as TGA measurements, potentially leading to more  $\text{H}_2$  production and larger phase swing; 4) background  $\text{O}_2$  can also oxidize the sample and give some phase swing; 5) oxygen nonstoichiometry isn't considered in such estimations, which could also be the mechanism of thermochemical water splitting of PCOs.

### *X-ray absorption near edge structure (XANES)*

Fe K-edge, Co K-edge, Ni K-edge, and Zn K-edge XANES were measured at beamline 7-3 at Stanford Synchrotron Radiation Lightsource (SSRL). We used Si(220) double crystal monochromator, and transmission geometry was employed for XANES analysis. We measured metal foils together with samples to calibrate the energy. Powder samples were evenly spread onto the sticky Kapton tape. FeO, Fe<sub>3</sub>O<sub>4</sub>, Fe<sub>2</sub>O<sub>3</sub>, CoO, Co<sub>3</sub>O<sub>4</sub>, LiCoO<sub>2</sub>, NiO, NiFe<sub>2</sub>O<sub>4</sub>, and La<sub>2</sub>NiO<sub>4</sub> powder samples were purchased and measured for standard absorption edge of specific oxidation state of each element. The Athena software was used to calibrate the energy of each data set. **Figure S7** shows the XANES data for Co and Ni edge, whereas that for Fe is shown in **Figure 4c**.

### *SEM*

Scanning electron microscopy (SEM) images were obtained on an FEI XL30 Sirion field-emission gun SEM at 5 kV. Lens astigmatism was addressed when necessary.

### **5. Calculation of Thermodynamic Limit of H<sub>2</sub> Production for LSM perovskites, CeO<sub>2</sub> and spinel ferrites**

Thermochemistry data of LSM perovskites, e.g., LSM30 (La<sub>0.7</sub>Sr<sub>0.3</sub>MnO<sub>3-δ</sub>), and CeO<sub>2</sub> were taken from literature of CALPHAD simulation<sup>3,4</sup> and experiments<sup>5-7</sup>. Those data contain oxygen nonstoichiometry at various temperatures and pO<sub>2</sub> values, which can be used to calculate the thermodynamic limit of H<sub>2</sub> production in TWS through difference in equilibrium oxygen nonstoichiometries between thermal reduction and water splitting conditions. Specifically, the equilibrium oxygen nonstoichiometry at T<sub>H</sub> was calculated for a pO<sub>2</sub> of 10<sup>-5</sup> atm. This corresponds to a situation where the reactor pO<sub>2</sub> at the end of the oxygen release step is at this given value. Similarly, the equilibrium oxygen nonstoichiometry was calculated at T<sub>L</sub> for a range of pH<sub>2</sub>:pH<sub>2</sub>O. Again, this corresponds to a situation where the reactor H<sub>2</sub>:H<sub>2</sub>O molar ratio is at this given value at the end of the hydrogen release step.

For example, for H<sub>2</sub>:H<sub>2</sub>O = 1:1045, the equilibrium constant of reaction H<sub>2</sub> (g) + 1/2O<sub>2</sub> (g) = H<sub>2</sub>O (g) is interpolated to be 10<sup>9.201</sup> at 800°C (linear interpolation of the logarithms), giving equivalent pO<sub>2</sub> as 10<sup>-12.36</sup> atm. Negative H<sub>2</sub> production (where the oxygen nonstoichiometry at T<sub>L</sub> exceeded



that at  $T_H$ ) is also calculated. We note that these calculations are somewhat different than that for a closed-system (i.e., batch reactor) typically done in literature, and reflect the fact that most experiments are carried out in an open-system (i.e., continuous flow reactor). **Tables S6** and **S7** provide the results of the thermodynamic limit calculations.

Thermodynamic limits of  $H_2$  production by  $NiFe_2O_4$  and  $CoFe_2O_4$  were calculated based on the method of  $\Delta H_O$  vs.  $\Delta S_O$  plot analysis from Miller et al.<sup>8</sup> and data from CALPHAD simulations presented in <sup>8,9</sup>. The equilibrium stoichiometry results are as **Table S8** shows.

### Supplementary Figures and Tables

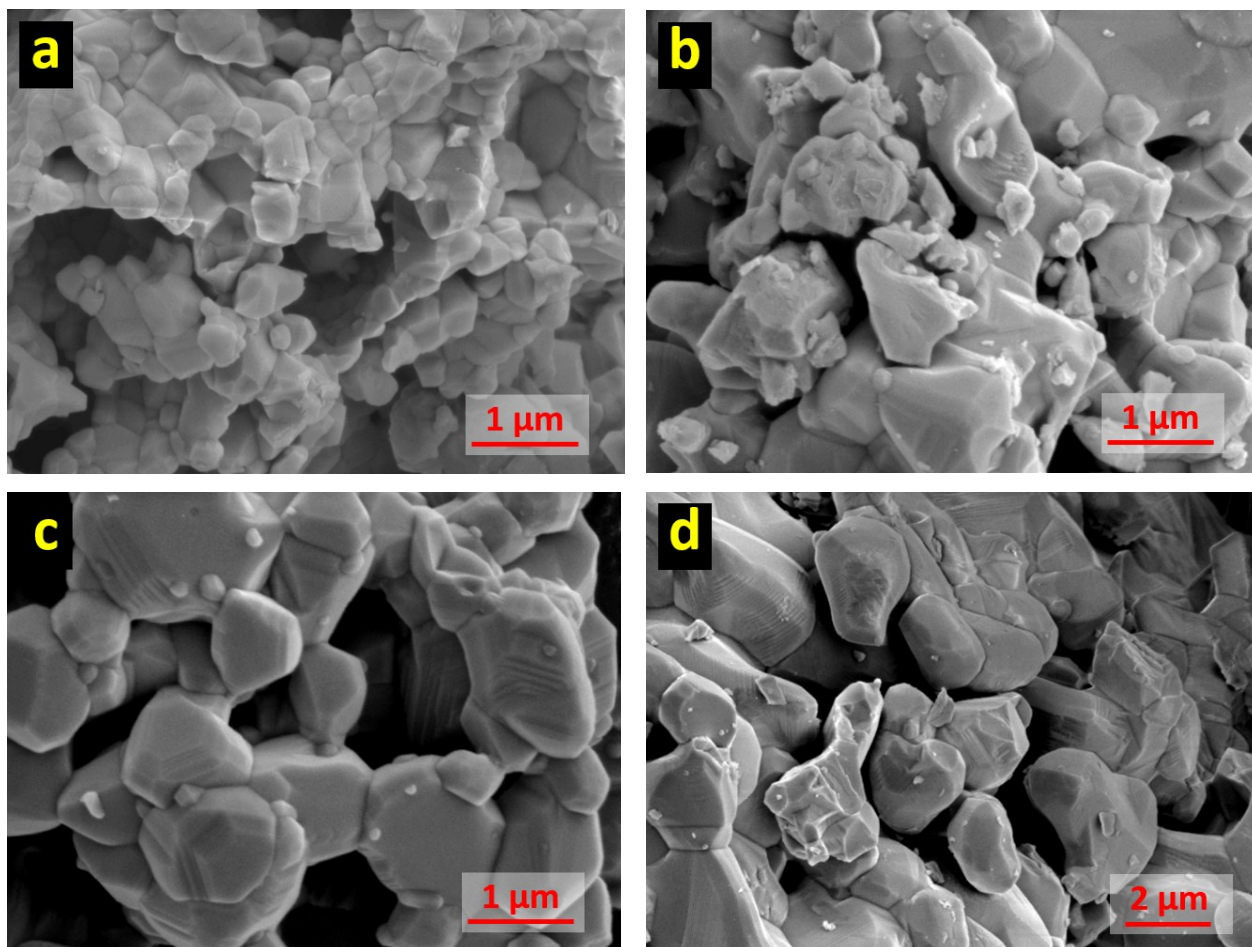

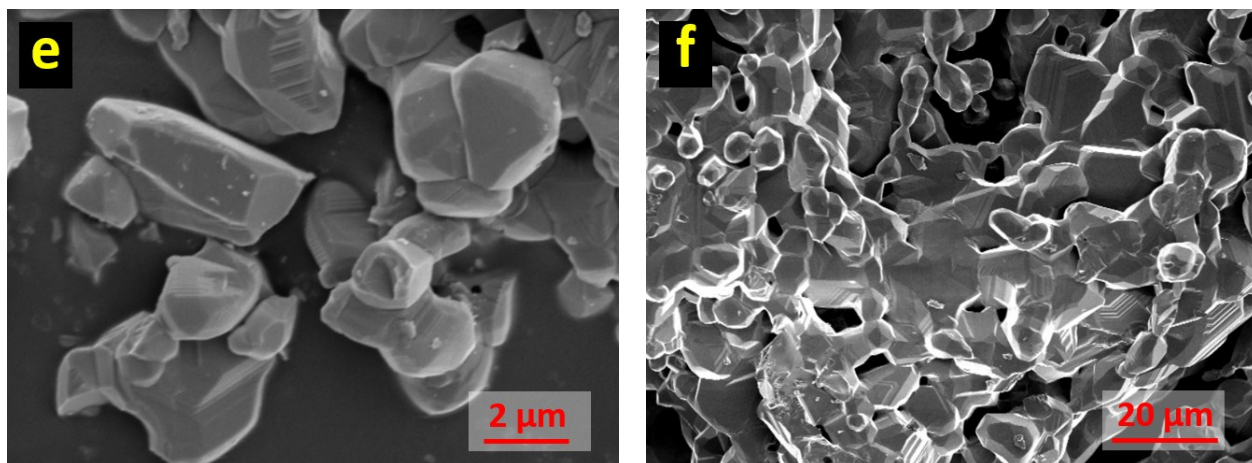

**Fig. S1. Morphology of sol-gel and solid-state synthesized (FeMgCoNi)O<sub>x</sub>.** (a) Sol-gel synthesized (FeMgCoNi)O<sub>x</sub>, using 1000°C calcination. (b) Sol-gel sample in (a) after going through two TWS cycles of T<sub>H</sub> = 1100°C and T<sub>L</sub> = 800°C; microstructure in (a) is sintered. (c) Sol-gel sample in (a) after going through ten TWS cycles of T<sub>H</sub> = 1100°C and T<sub>L</sub> = 800°C. (d) Sol-gel sample in (a) after going through two TWS cycles of T<sub>H</sub> = 1300°C and T<sub>L</sub> = 800°C; microstructure in (a) is strongly sintered. (e) Sol-gel sample in (a) after going through ten TWS cycles of T<sub>H</sub> = 1300°C and T<sub>L</sub> = 800°C. (f) Solid-state synthesized (FeMgCoNi)O<sub>x</sub>, with 1350°C calcination, has >~10μm particle size. TWS cycles mentioned above have 0.5 hr of TR and 1 hr of WS.

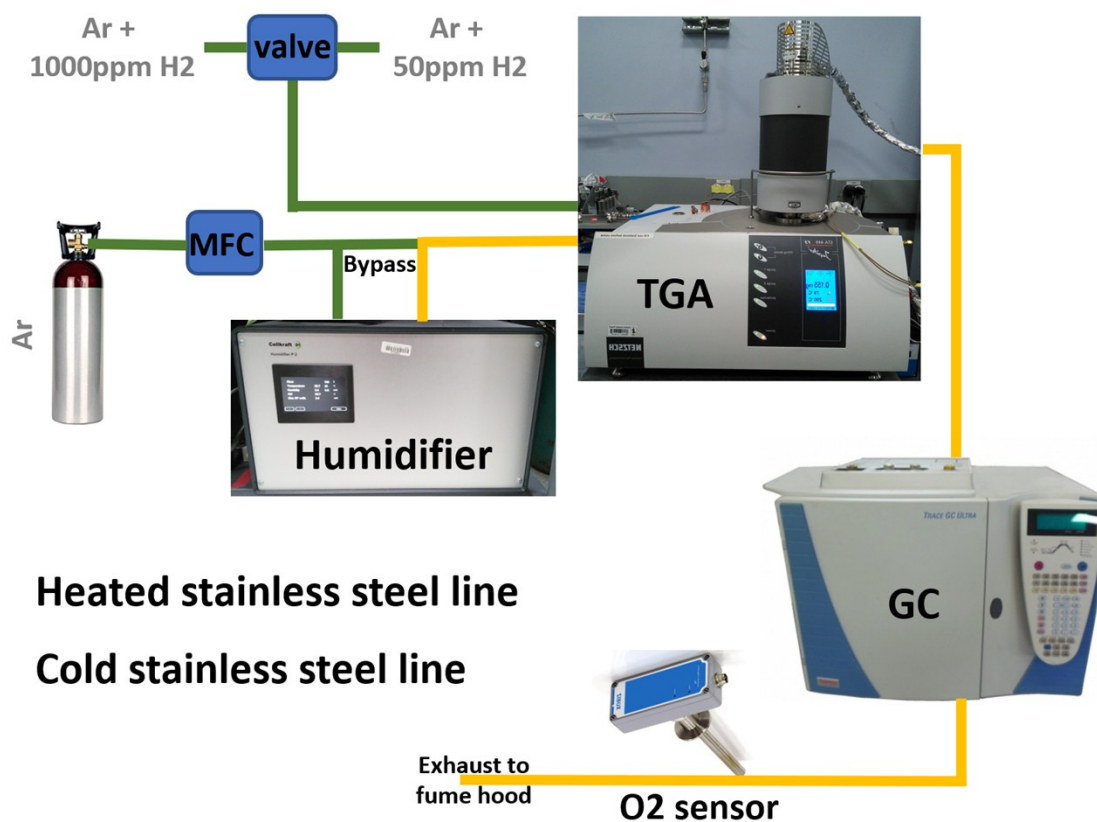

Fig. S2. TGA setup.

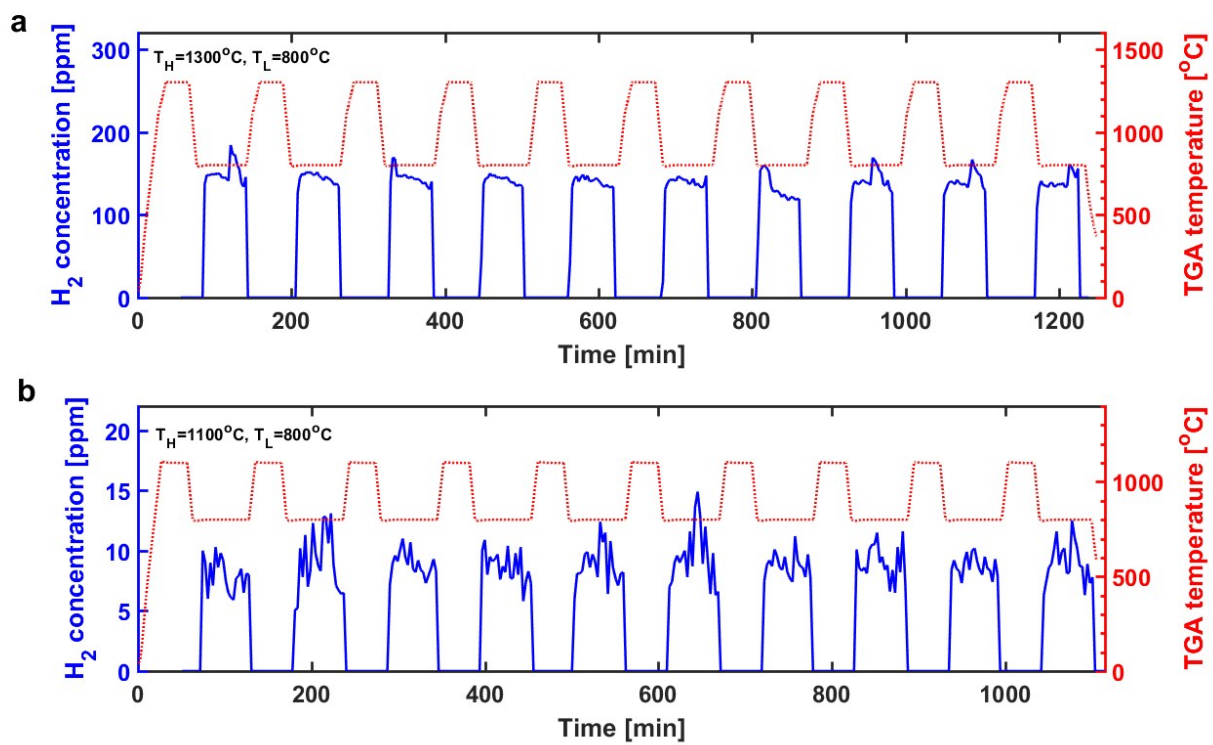

**Fig. S3. H<sub>2</sub> concentration and temperature time-history for 10-cycle TWS tests of sol-gel synthesized (FeMgCoNi)O<sub>x</sub> in TGA-GC..** Cycles with T<sub>H</sub> = 1300°C and T<sub>L</sub> = 800°C have 91 ppm H<sub>2</sub> background during water splitting steps; cycles with T<sub>H</sub> = 1100°C and T<sub>L</sub> = 800°C have 4.5 ppm H<sub>2</sub> background during water splitting steps. Instability of humidity in purge gas induced instability of H<sub>2</sub> concentration besides the noise of GC.

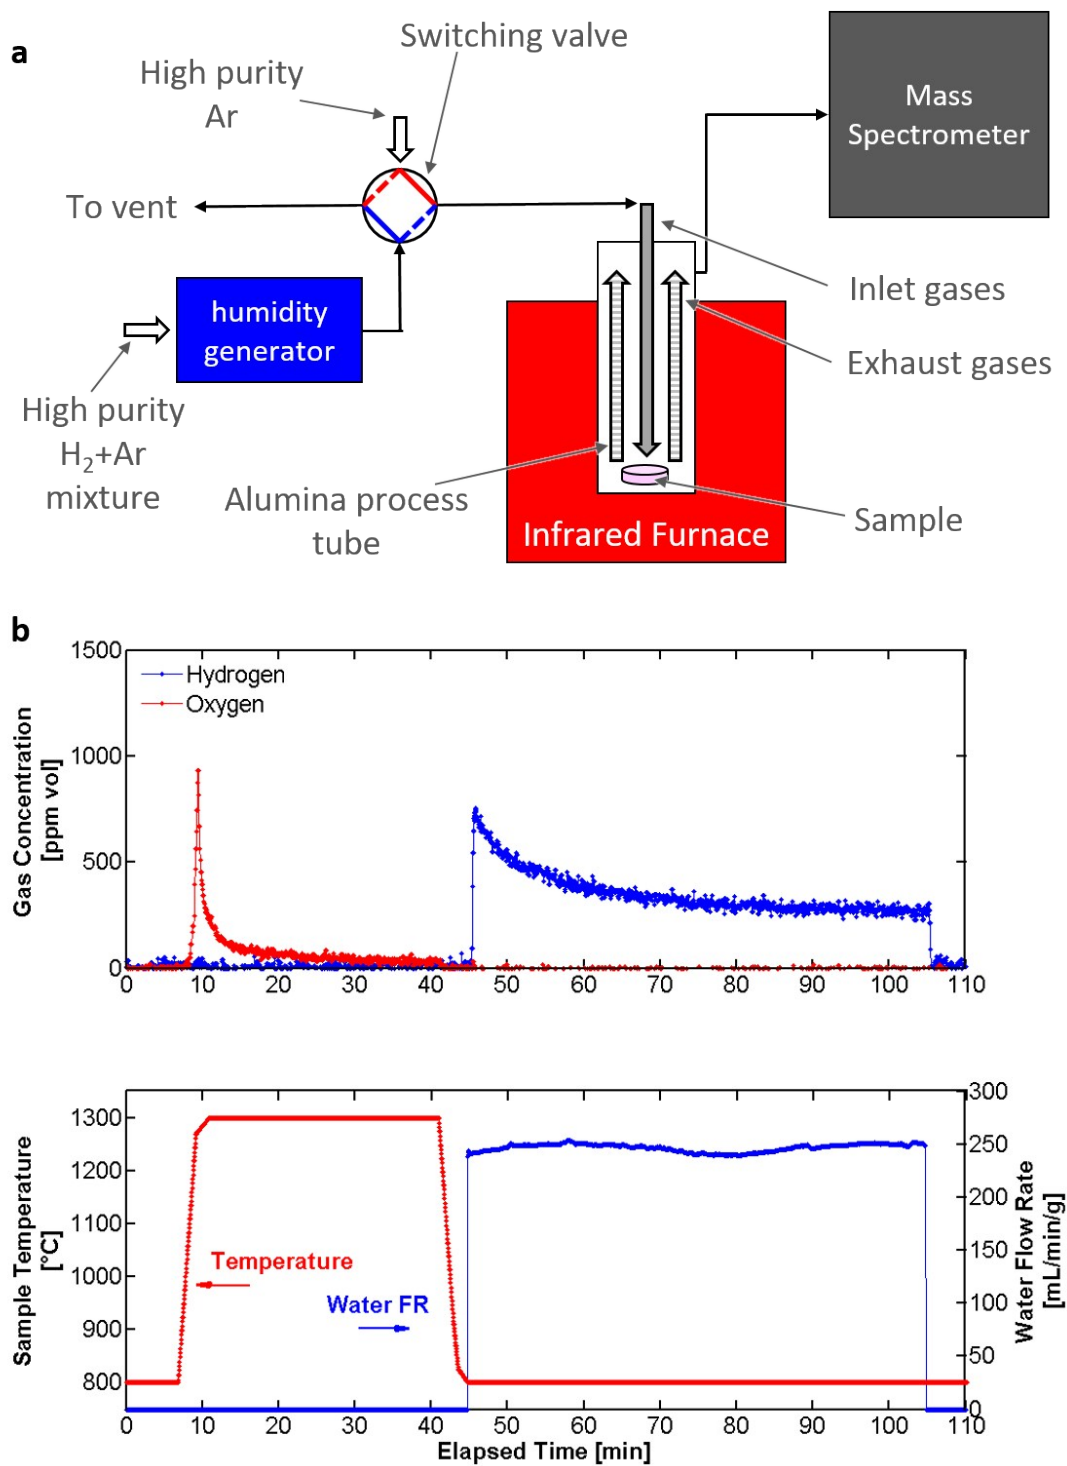

**Fig. S4. Stagnation flow reactor setup and example of raw cycling data. (a)** Schematic of stagnation flow reactor and gas delivery system. **(b)** Example raw concentration and temperature data used to generate kinetic curves shown in **Figure 3d**.

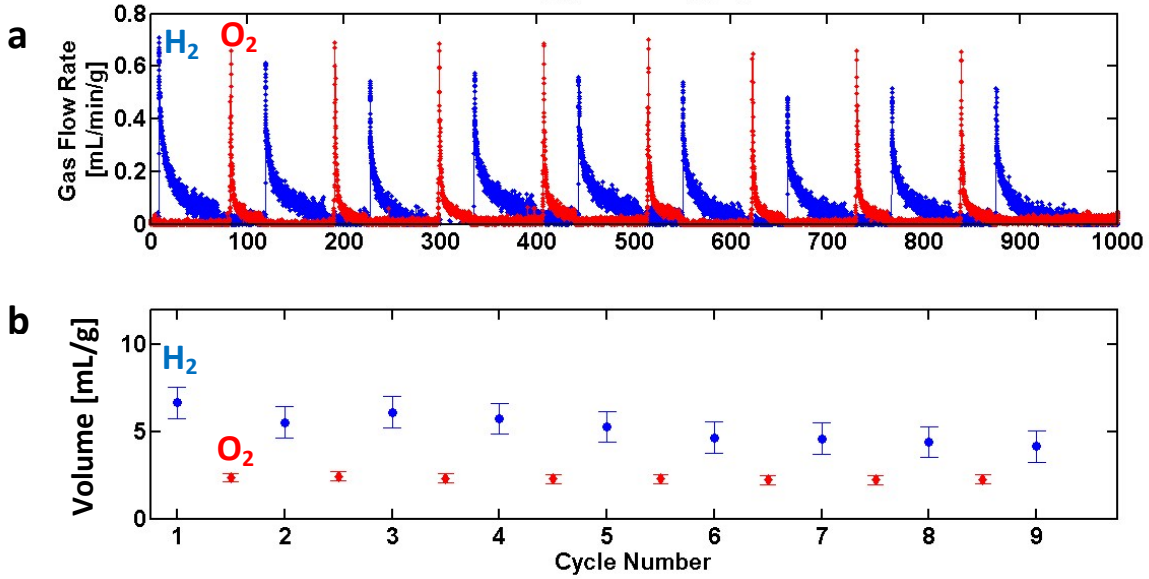

**Fig. S5. Kinetic cycling data from stagnation flow reactor.** (a) Nine thermochemical water-splitting cycles for equimolar (FeMgCoNi)O<sub>x</sub> synthesized by a solid-state route. The first oxygen release half-cycles are not shown because data recording began during the first water-splitting step. (b) Gas volume produced in each half-cycle.  $T_H = 1300^\circ\text{C}$  and  $T_L = 800^\circ\text{C}$  with  $\text{H}_2:\text{H}_2\text{O} = 10^{-3}$ .



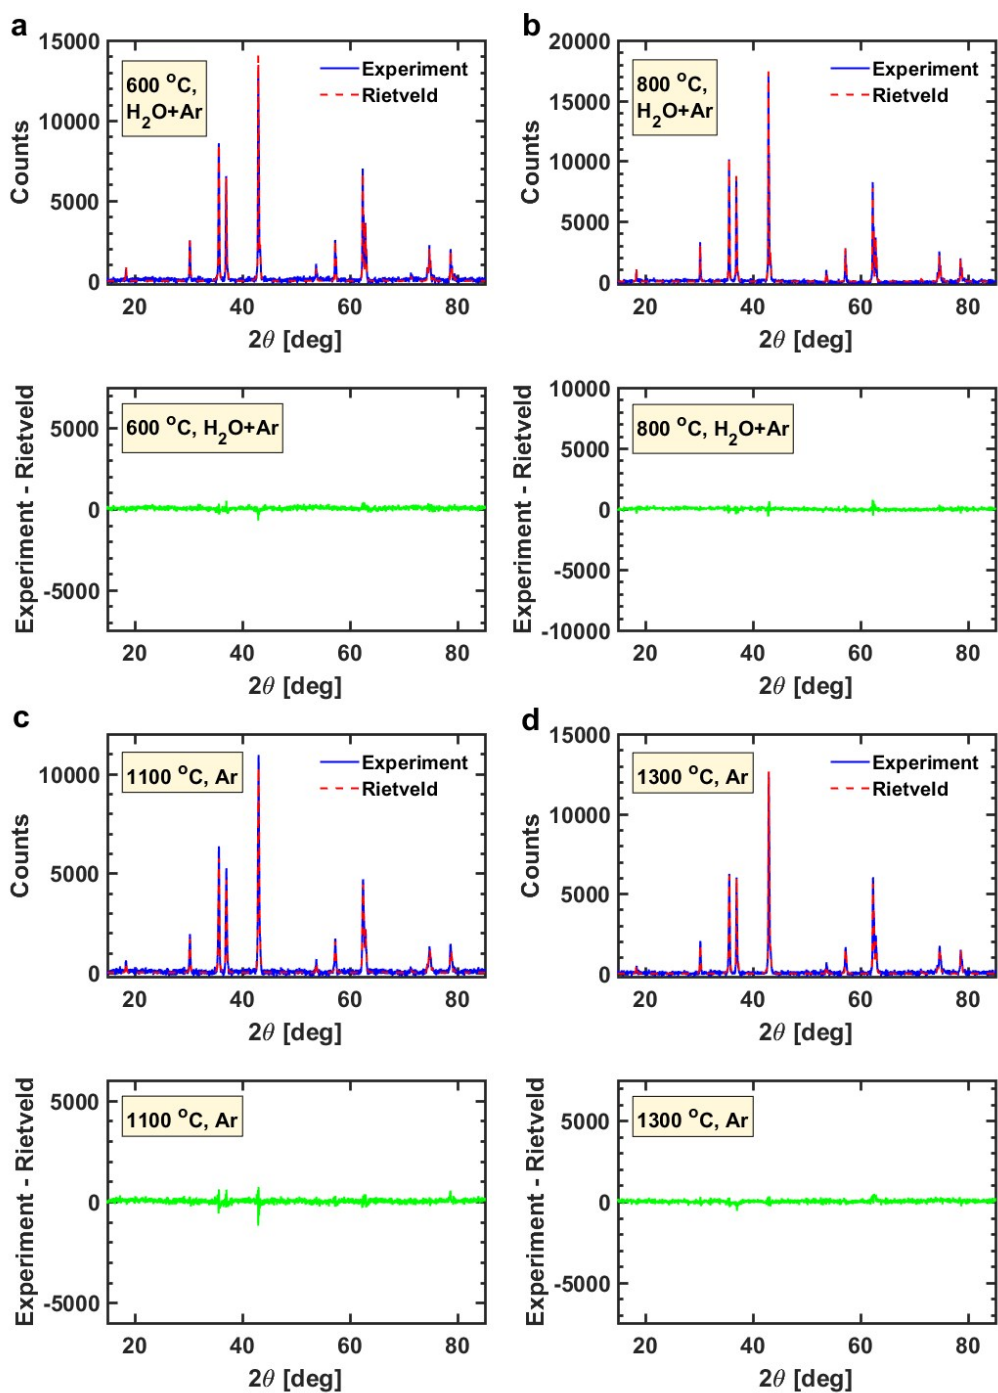

Fig. S6. Rietveld refinement results and difference plots for one set of quenched  $(\text{FeMgCoNi})\text{O}_x$ .

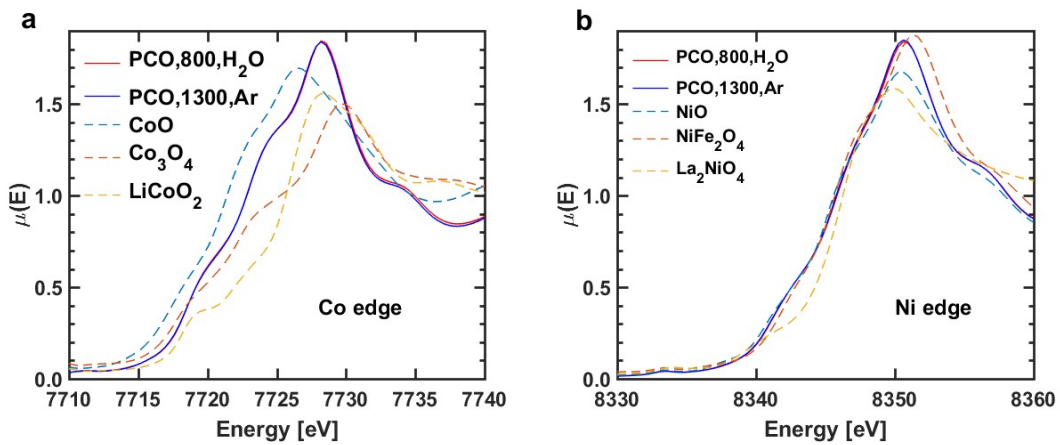

**Fig. S7. X-ray absorption near edge structure (XANES) result for the Co and Ni edges of quenched (FeMgCoNi)O<sub>x</sub>.** In contrast to Fe, Co and Ni are essentially “inert” in the redox cycles.



**Table S1.** Water splitting environments for various H<sub>2</sub>:H<sub>2</sub>O ratios

a. T<sub>H</sub> = 1300°C and T<sub>L</sub> = 800°C

| <b>Total flow rate [sccm]</b> | <b>Background H2 [ppm]</b> | <b>H<sub>2</sub>O [%]</b> | <b>p(H<sub>2</sub>O)/p(H<sub>2</sub>)</b> |
|-------------------------------|----------------------------|---------------------------|-------------------------------------------|
| 166                           | 90.5                       | 9.47                      | 1045                                      |
| 165                           | 121                        | 6.06                      | 500                                       |
| 164                           | 214                        | 5.31                      | 248                                       |
| 165                           | 383                        | 3.96                      | 104                                       |

b. T<sub>H</sub> = 1100°C and T<sub>L</sub> = 800°C

| <b>Total flow rate [sccm]</b> | <b>Background H2 [ppm]</b> | <b>H<sub>2</sub>O [%]</b> | <b>p(H<sub>2</sub>O)/p(H<sub>2</sub>)</b> |
|-------------------------------|----------------------------|---------------------------|-------------------------------------------|
| 166                           | 4.5                        | 9.47                      | 20909                                     |
| 162                           | 9.2                        | 6.92                      | 7481                                      |
| 162                           | 10.8                       | 3.97                      | 3684                                      |
| 164                           | 16.4                       | 3.30                      | 2009                                      |

**Table S2.** Comparison of TG derived H<sub>2</sub> production with direct GC quantification results, for the 2<sup>nd</sup> TWS cycle.

| Sample                   | Temperature | TR time | WS time | H <sub>2</sub> :H <sub>2</sub> O during WS | TGA derived, mL-H <sub>2</sub> /g | GC, mL-H <sub>2</sub> /g |
|--------------------------|-------------|---------|---------|--------------------------------------------|-----------------------------------|--------------------------|
| (FeMgCoNi)O <sub>x</sub> | 1100-800°C  | 30 min  | 1 hr    | 1:20909                                    | 0.56                              | 0.32                     |
|                          |             | 5 hrs   | 5 hrs   |                                            | 2.78                              | 1.42                     |
|                          | 1300-800°C  | 30 min  | 1 hr    | 1:1045                                     | 3.39                              | 2.97                     |
|                          |             | 5 hrs   | 5 hrs   |                                            | 9.32                              | 10.09                    |

**Table S3.** Spinel phase settings

| Space group: Fd-3m |                   |        |        |        |           |
|--------------------|-------------------|--------|--------|--------|-----------|
| Atom               | Wyckoff positions | x      | y      | z      | Occupancy |
| Fe1                | 8b                | 0.375  | 0.375  | 0.375  | 1         |
| Fe2                | 16c               | 0      | 0      | 0      | 1         |
| O1                 | 32e               | 0.2445 | 0.2445 | 0.2445 | 1         |

**Table S4.** Rocksalt phase settings

| Space group: Fm-3m |                   |     |     |     |           |
|--------------------|-------------------|-----|-----|-----|-----------|
| Atom               | Wyckoff positions | x   | y   | z   | Occupancy |
| Fe1                | 4a                | 0   | 0   | 0   | t         |
| O1                 | 4b                | 0.5 | 0.5 | 0.5 | 1         |

**Table S5.** Rietveld refinement results of quenched (FeMgCoNi)O<sub>x</sub>

| Batch # | Sweep gas           | T <sub>quench</sub> [°C] | Rocksalt phase   |                          |                    | Spinel phase     |                    | Goodness-of-fit |
|---------|---------------------|--------------------------|------------------|--------------------------|--------------------|------------------|--------------------|-----------------|
|         |                     |                          | Volumetric Ratio | t (in Fe <sub>t</sub> O) | Lattice param. [Å] | Volumetric Ratio | Lattice param. [Å] |                 |
| 1       | H <sub>2</sub> O+Ar | 600                      | 0.66(1)          | 0.750(3)                 | 4.21454(5)         | 0.338(3)         | 8.3731(1)          | 1.59            |
|         |                     | 800                      | 0.66(1)          | 0.751(3)                 | 4.21527(6)         | 0.342(3)         | 8.3754(1)          | 1.17            |
|         | Ar                  | 1100                     | 0.67(1)          | 0.766(3)                 | 4.21413(5)         | 0.327(2)         | 8.3761(1)          | 1.40            |
|         |                     | 1300                     | 0.70(1)          | 0.772(3)                 | 4.21578(9)         | 0.301(3)         | 8.3820(3)          | 1.26            |
| 2       | H <sub>2</sub> O+Ar | 600                      | 0.67(1)          | 0.738(3)                 | 4.21379(4)         | 0.334(2)         | 8.3693(1)          | 1.51            |
|         |                     | 800                      | 0.67(1)          | 0.718(4)                 | 4.21411(9)         | 0.327(4)         | 8.3694(2)          | 1.42            |
|         | Ar                  | 1100                     | 0.68(1)          | 0.745(3)                 | 4.21264(5)         | 0.319(3)         | 8.3759(1)          | 1.43            |
|         |                     | 1300                     | 0.70(1)          | 0.742(3)                 | 4.2150(1)          | 0.305(4)         | 8.3766(3)          | 1.29            |
| 3       | H <sub>2</sub> O+Ar | 600                      | 0.67(1)          | 0.758(4)                 | 4.21449(7)         | 0.333(4)         | 8.3684(2)          | 1.11            |
|         |                     | 800                      | 0.68(1)          | 0.771(4)                 | 4.21868(6)         | 0.322(4)         | 8.3735(1)          | 1.05            |
|         | Ar                  | 1100                     | 0.68(1)          | 0.777(5)                 | 4.2134(1)          | 0.318(5)         | 8.3704(3)          | 1.16            |
|         |                     | 1300                     | 0.70(1)          | 0.764(5)                 | 4.2178(1)          | 0.300(4)         | 8.3768(3)          | 1.03            |

**Table S6.** Thermodynamic H<sub>2</sub> yields (unit: mL/g) of CeO<sub>2</sub> and LSM at T<sub>H</sub> = 1300°C with pO<sub>2</sub> = 10<sup>-5</sup> atm and T<sub>L</sub> = 800°C with various H<sub>2</sub>O:H<sub>2</sub> ratios. Data sources are noted in the 2<sup>nd</sup> row. Negative H<sub>2</sub> production means sample consumes H<sub>2</sub> in background and gets further reduced in the corresponding water splitting condition.

| p(H <sub>2</sub> O)/p(H <sub>2</sub> ) | LSM20             | LSM30             | LSM40                                              | CeO <sub>2</sub>                                   |                                                        |      |
|----------------------------------------|-------------------|-------------------|----------------------------------------------------|----------------------------------------------------|--------------------------------------------------------|------|
|                                        | Bork <sup>3</sup> | Bork <sup>3</sup> | Tagawa <sup>6</sup><br>and<br>Scheffe <sup>7</sup> | Tagawa <sup>6</sup><br>and<br>Scheffe <sup>7</sup> | Panlener <sup>5</sup><br>and<br>Zinkevich <sup>4</sup> |      |
| 1045                                   | 0.77              | 1.58              | 2.67                                               | 1.62                                               | 4.55                                                   | 1.41 |
| 500                                    | 0.58              | 0.59              | 2.08                                               | -0.51                                              | 2.43                                                   | 1.40 |
| 248                                    | 0.10              | -0.59             | 1.09                                               | -2.73                                              | 0.40                                                   | 1.38 |
| 104                                    | -0.87             | -2.57             | -0.69                                              | -5.06                                              | -2.13                                                  | 1.35 |

**Table S7.** Thermodynamic H<sub>2</sub> yields (unit: mL/g) of CeO<sub>2</sub> and LSM at T<sub>H</sub> = 1100°C with pO<sub>2</sub> = 10<sup>-5</sup> atm and T<sub>L</sub> = 800°C with various H<sub>2</sub>O:H<sub>2</sub> ratios. Data sources are noted in the 2<sup>nd</sup> row. Negative H<sub>2</sub> production means sample consumes H<sub>2</sub> in background and gets further reduced in the corresponding water splitting condition.

| p(H <sub>2</sub> O)/p(H <sub>2</sub> ) | LSM20             | LSM30             | LSM40                                              | CeO <sub>2</sub>                                   |                                                        |      |
|----------------------------------------|-------------------|-------------------|----------------------------------------------------|----------------------------------------------------|--------------------------------------------------------|------|
|                                        | Bork <sup>3</sup> | Bork <sup>3</sup> | Tagawa <sup>6</sup><br>and<br>Scheffe <sup>7</sup> | Tagawa <sup>6</sup><br>and<br>Scheffe <sup>7</sup> | Panlener <sup>5</sup><br>and<br>Zinkevich <sup>4</sup> |      |
| 20909                                  | 0.10              | 0.20              | 0.40                                               | 0.71                                               | 1.54                                                   | 0.18 |
| 7481                                   | 0.10              | 0                 | 0.20                                               | -0.40                                              | 0.53                                                   | 0.17 |
| 3684                                   | 0                 | -0.20             | 0                                                  | -1.52                                              | -0.59                                                  | 0.16 |
| 2009                                   | 0                 | -0.49             | -0.20                                              | -2.93                                              | -1.9                                                   | 0.15 |

**Table S8.** Thermodynamic equilibrium oxygen stoichiometry for NiFe<sub>2</sub>O<sub>4</sub> and CoFe<sub>2</sub>O<sub>4</sub>.

| Stoichiometric Material                                                               | NiFe <sub>2</sub> O <sub>4</sub>    | CoFe <sub>2</sub> O <sub>4</sub>     |
|---------------------------------------------------------------------------------------|-------------------------------------|--------------------------------------|
| T <sub>H</sub> = 1300°C and pO <sub>2</sub> = 10 <sup>-5</sup> atm                    | NiFe <sub>2</sub> O <sub>3.87</sub> | CoFe <sub>2</sub> O <sub>3.87</sub>  |
| T <sub>L</sub> = 800°C and H <sub>2</sub> :H <sub>2</sub> O = 1 : 10 <sup>3</sup>     | NiFe <sub>2</sub> O <sub>3.97</sub> | CoFe <sub>2</sub> O <sub>3.975</sub> |
| T <sub>H</sub> = 1100°C and pO <sub>2</sub> = 10 <sup>-5</sup> atm                    | NiFe <sub>2</sub> O <sub>3.97</sub> | CoFe <sub>2</sub> O <sub>3.998</sub> |
| T <sub>L</sub> = 800°C and H <sub>2</sub> :H <sub>2</sub> O = 1 : 2.1×10 <sup>4</sup> | NiFe <sub>2</sub> O <sub>4</sub>    | CoFe <sub>2</sub> O <sub>4</sub>     |

## Supplementary References

- 1 J. Shao, 2018, Personal communication.
- 2 D. Carta, M. F. Casula, A. Falqui, D. Loche, G. Mountjoy, C. Sangregorio and A. Corrias, *J. Phys. Chem. C*, 2009, **113**, 8606–8615.
- 3 A. H. Bork, E. Povoden-Karadeniz and J. L. M. Rupp, *Adv. Energy Mater.*, 2017, **7**, 1601086.
- 4 M. Zinkevich, D. Djurovic and F. Aldinger, *Solid State Ionics*, 2006, **177**, 989–1001.
- 5 R. J. Panlener, R. N. Blumenthal and J. E. Garnier, *J. Phys. Chem. Solids*, 1975, **36**, 1213–1222.
- 6 H. Tagawa, in *Proceedings of the 5th International Symposium on Solid Oxide Fuel Cells (SOFC-V)*, Aachen, Germany, 1997.
- 7 J. R. Scheffe, D. Weibel and A. Steinfeld, *Energy & Fuels*, 2013, **27**, 4250–4257.
- 8 J. E. Miller, A. H. McDaniel and M. D. Allendorf, *Adv. Energy Mater.*, 2014, **4**, 1300469.
- 9 I.-H. Jung, S. A. Deckerov, A. D. Pelton, H.-M. Kim and Y.-B. Kang, *Acta Mater.*, 2004, **52**, 507–519.
